# Supplementary material for: Bcl9 Depletion Modulates Endothelial Cell in Tumor Immune Microenvironment in Colorectal Cancer Tumor
Source: PubMed Central journal article supplement (PMC7856347; doi:10.3389/fonc.2020.603702), 2021-01-19

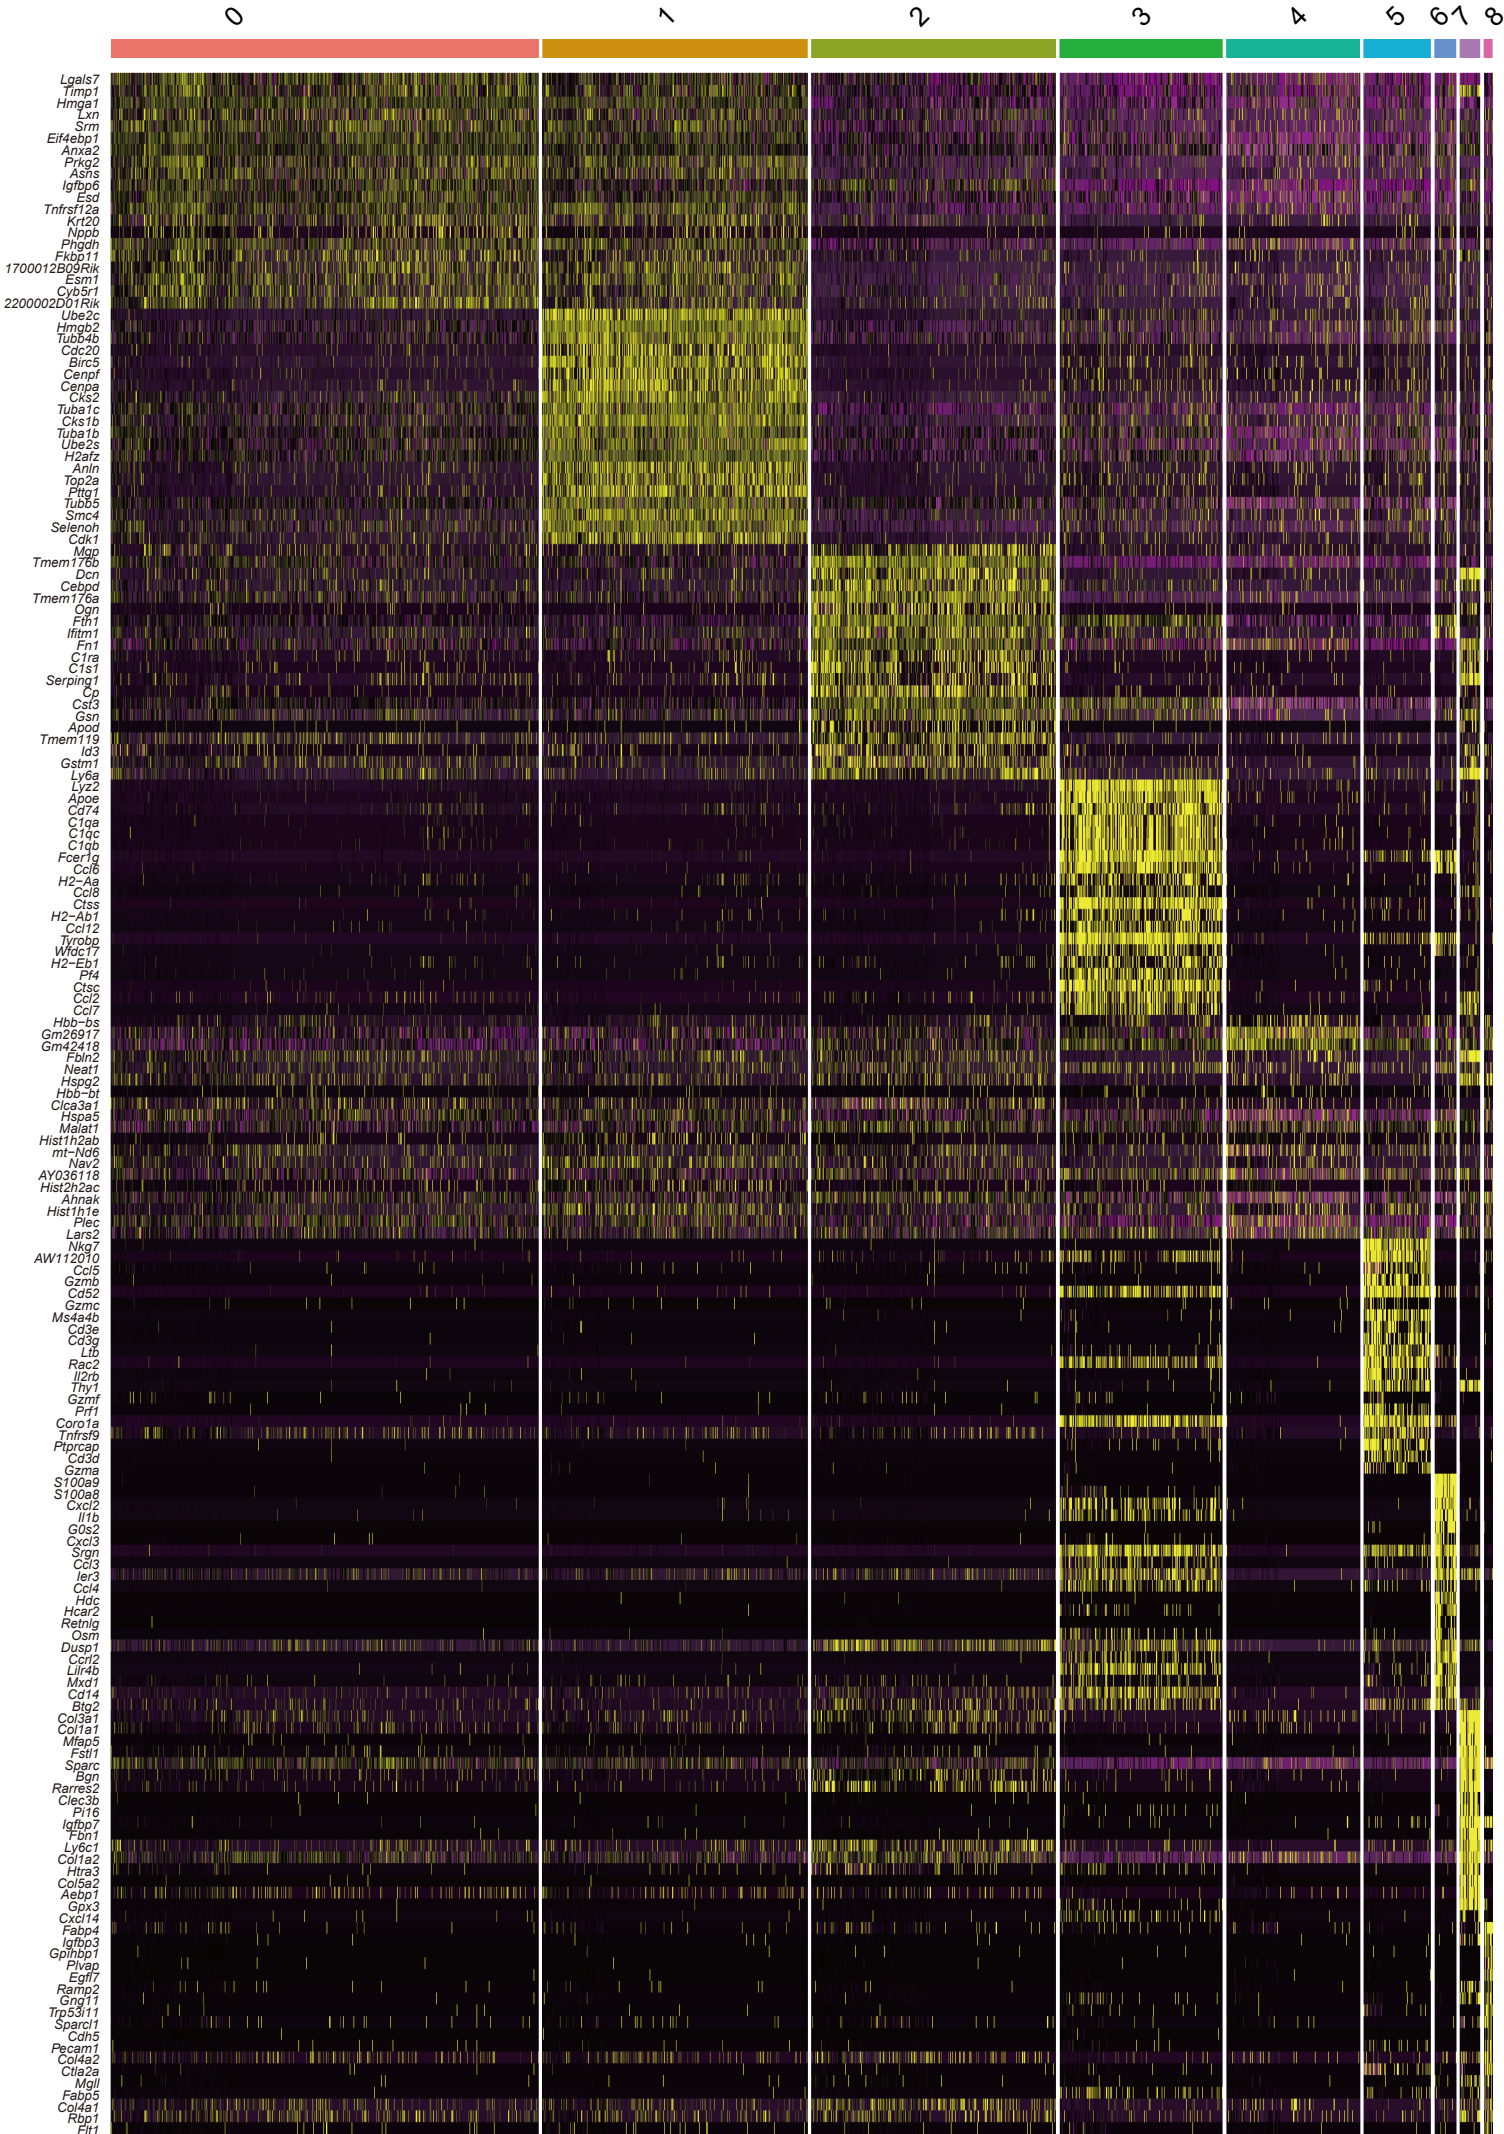

Supplementary Figure 1

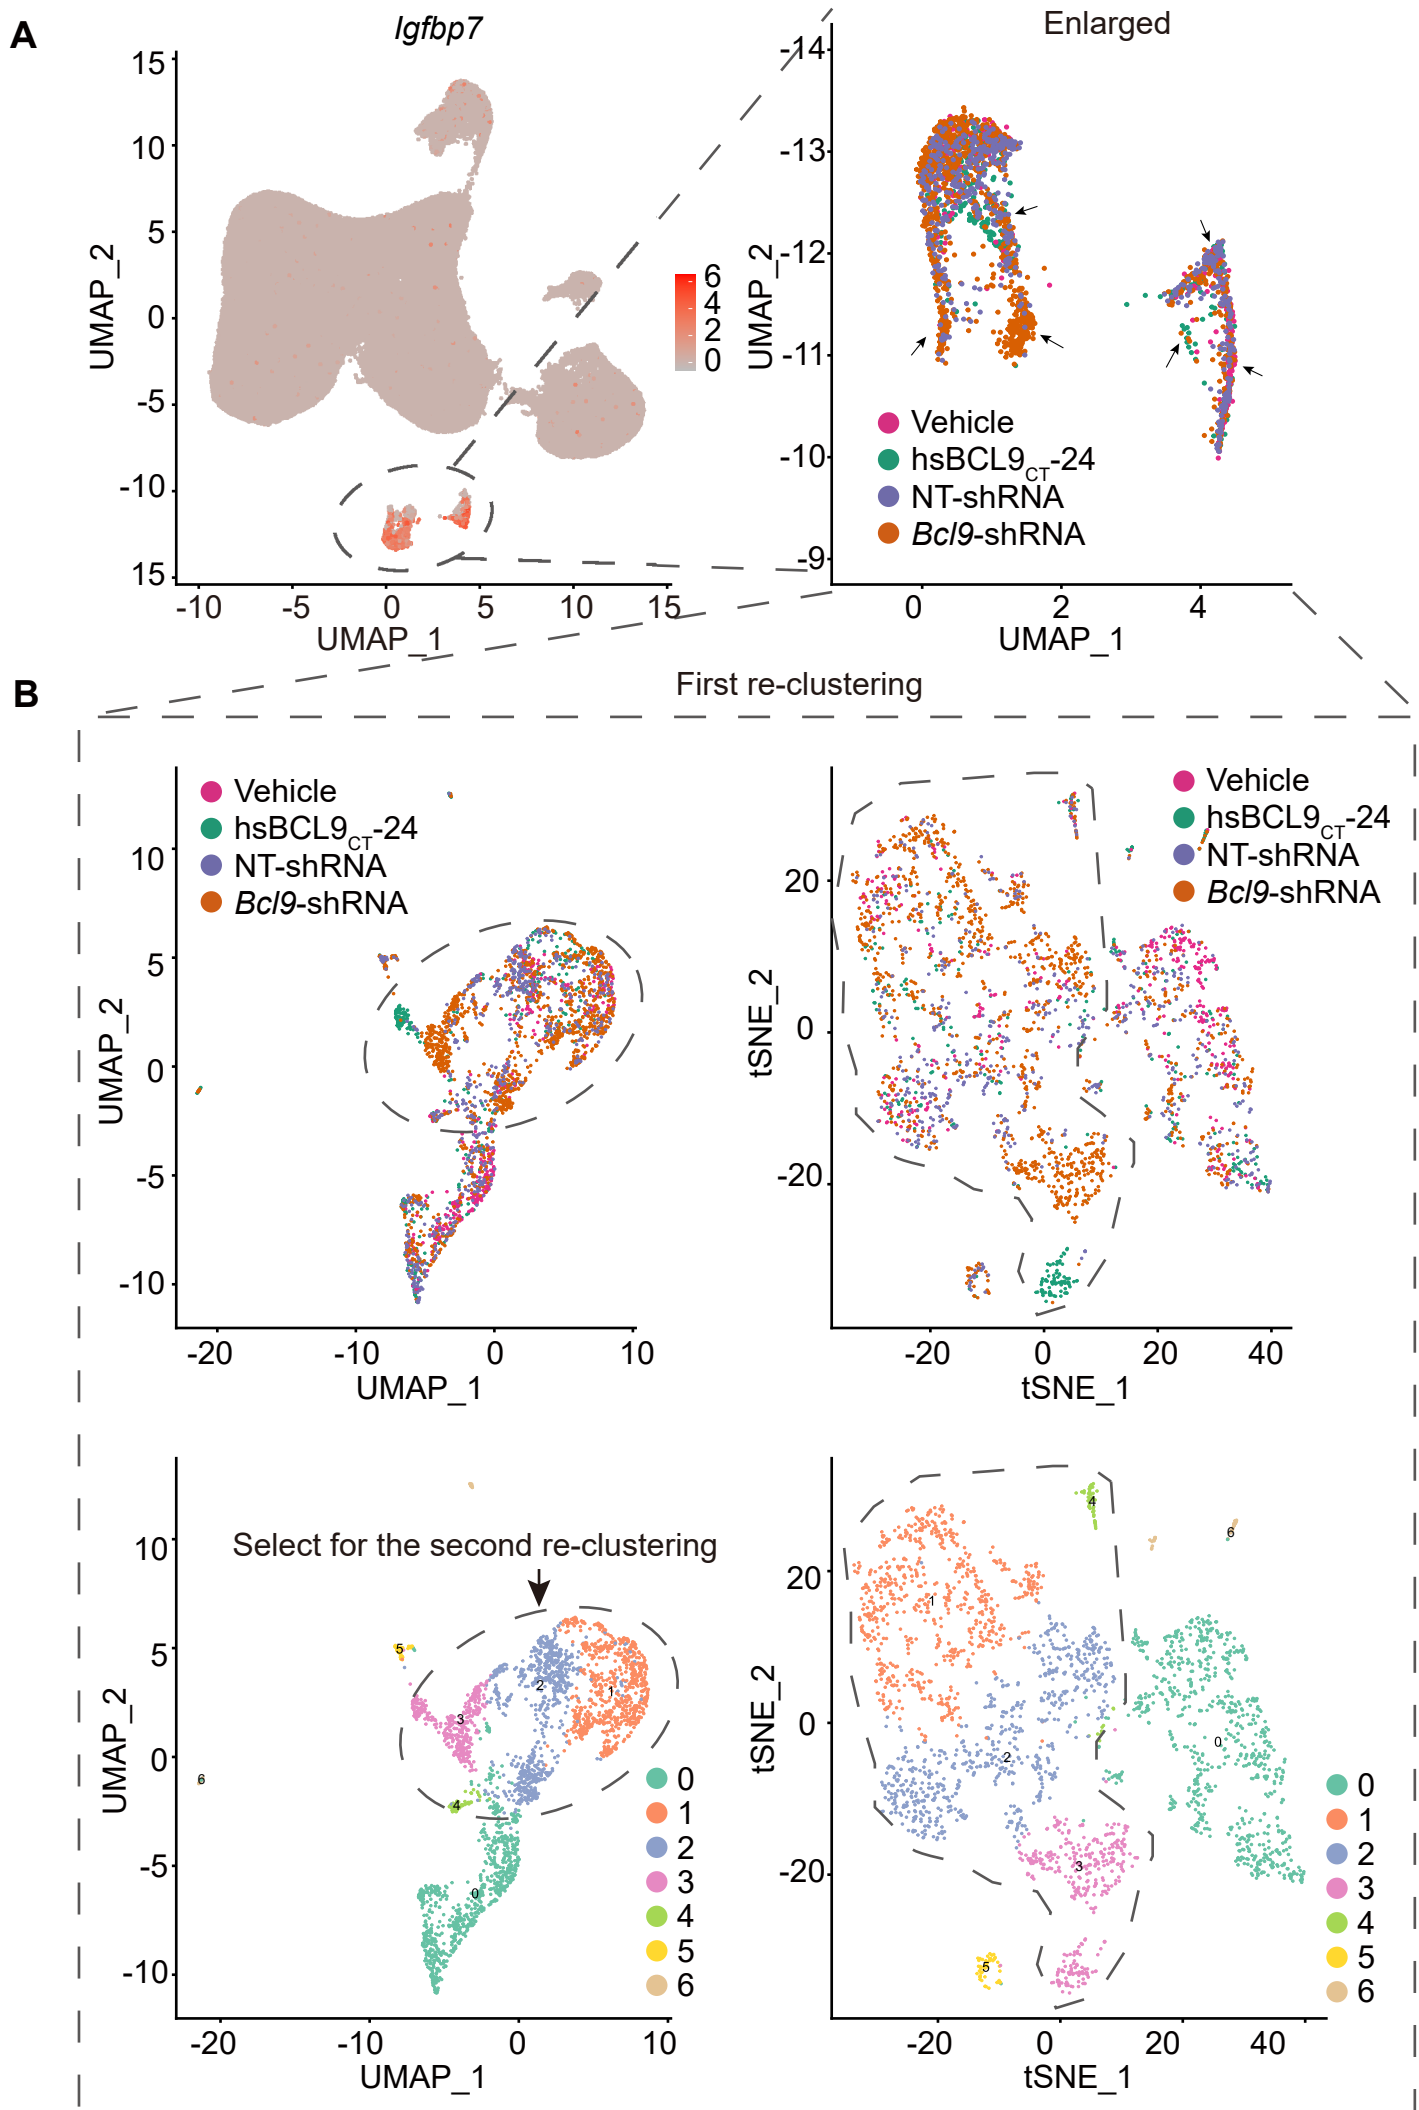

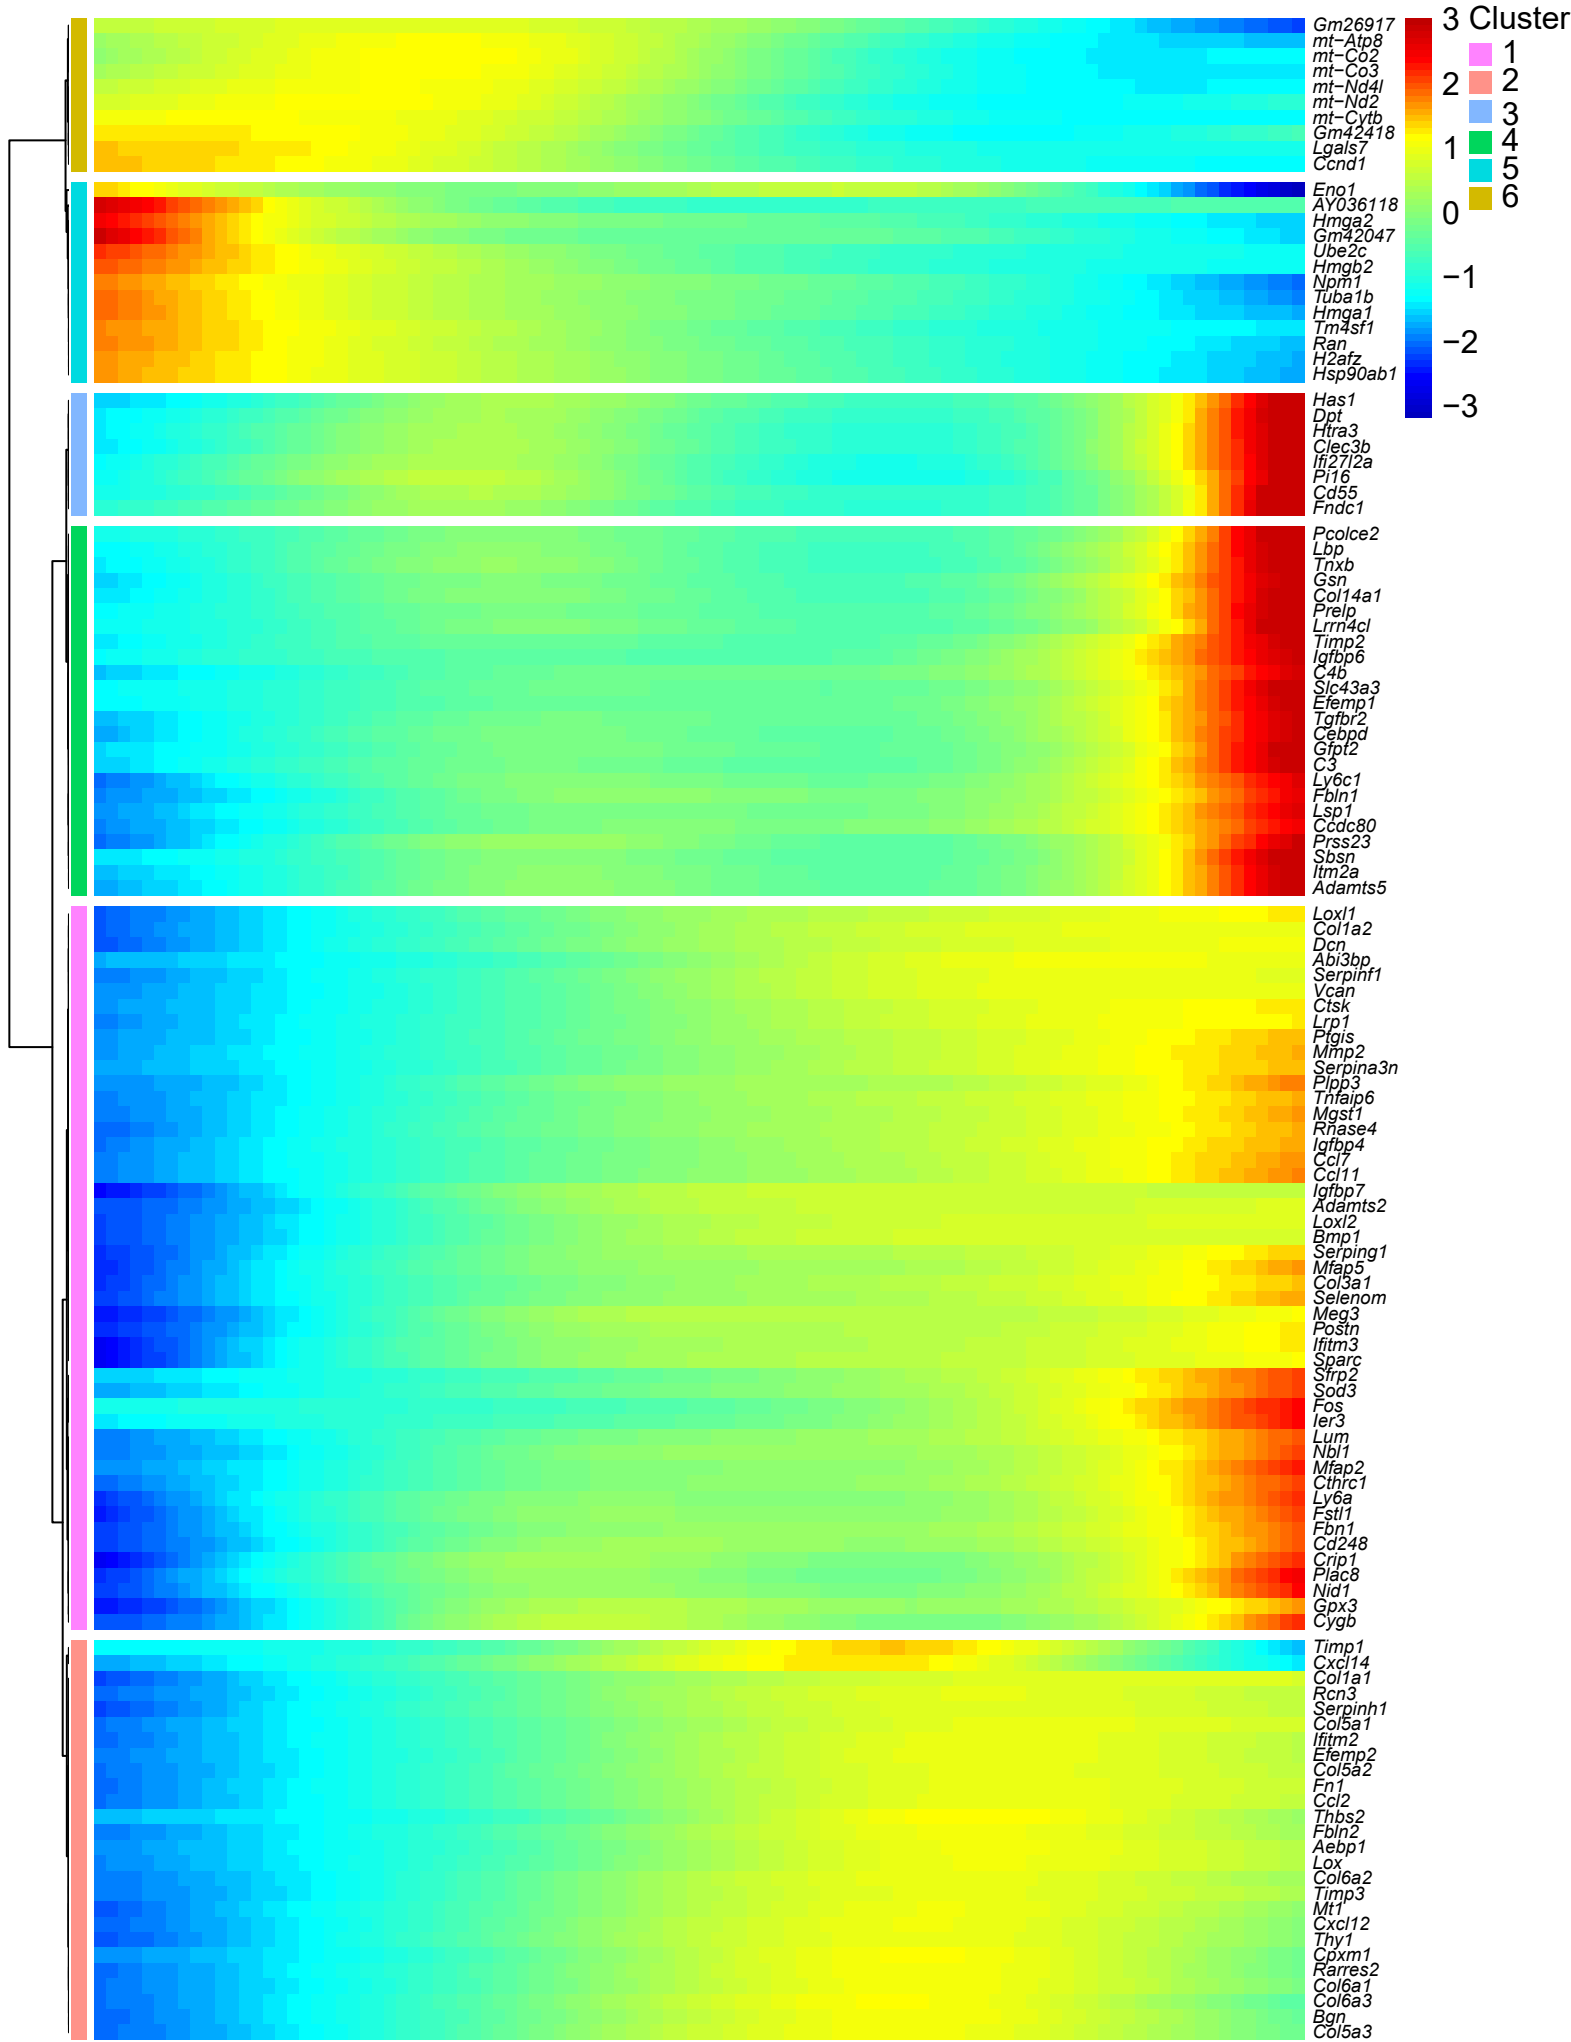

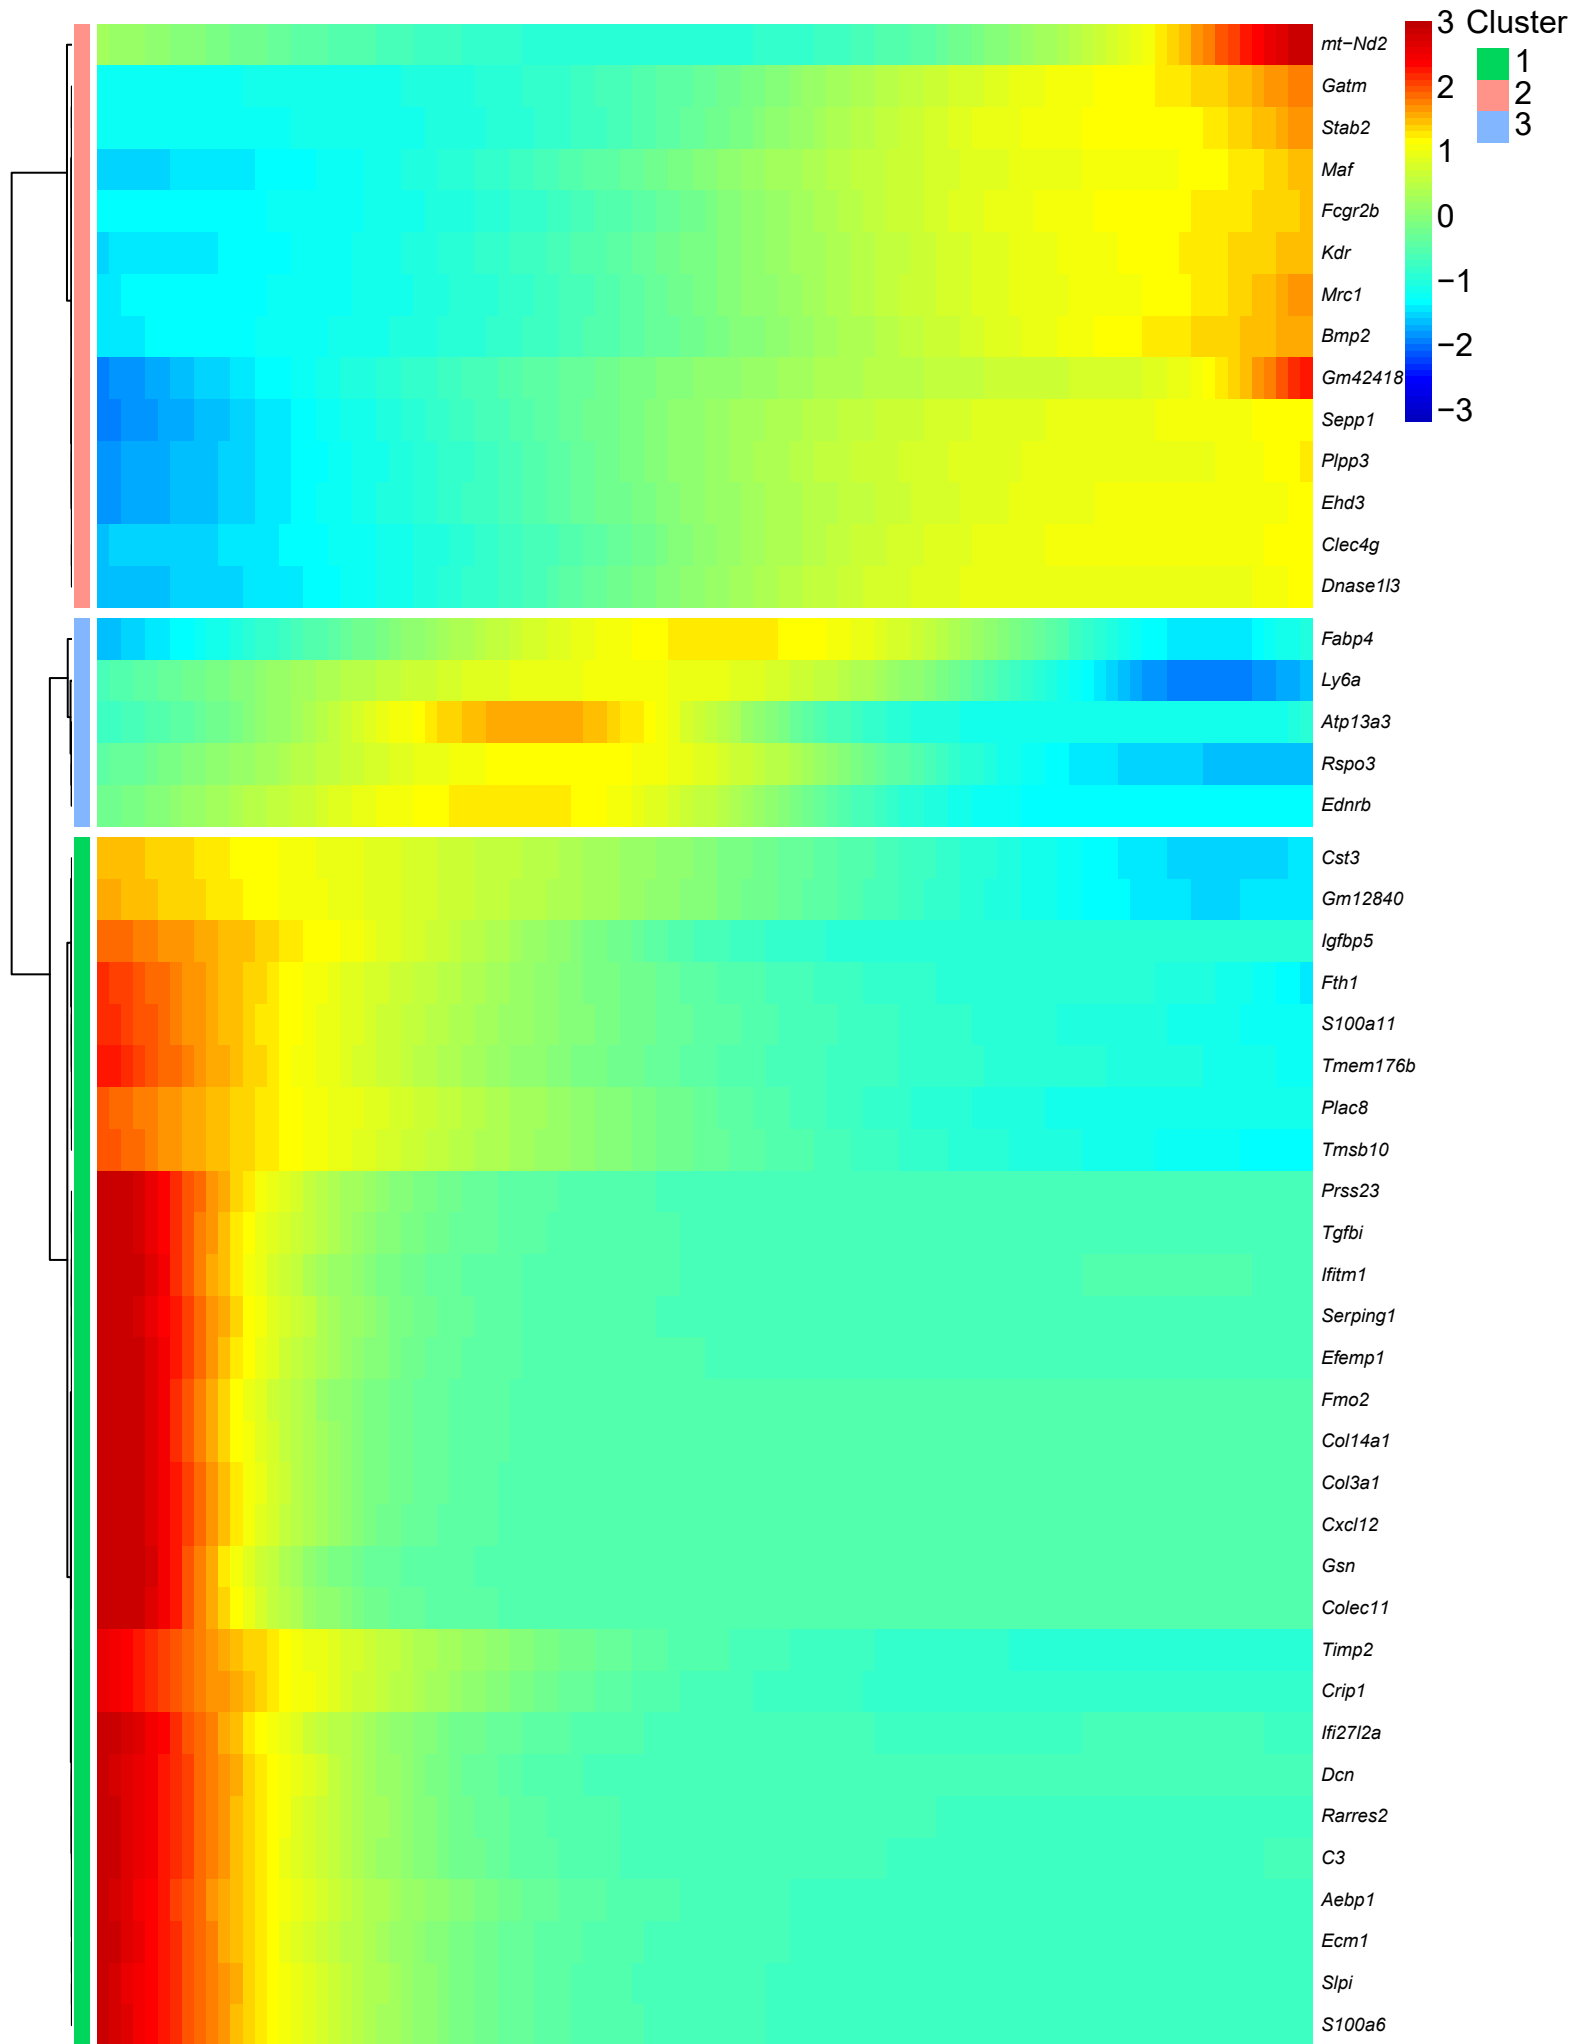

Cluster

### BCL9 True gene list

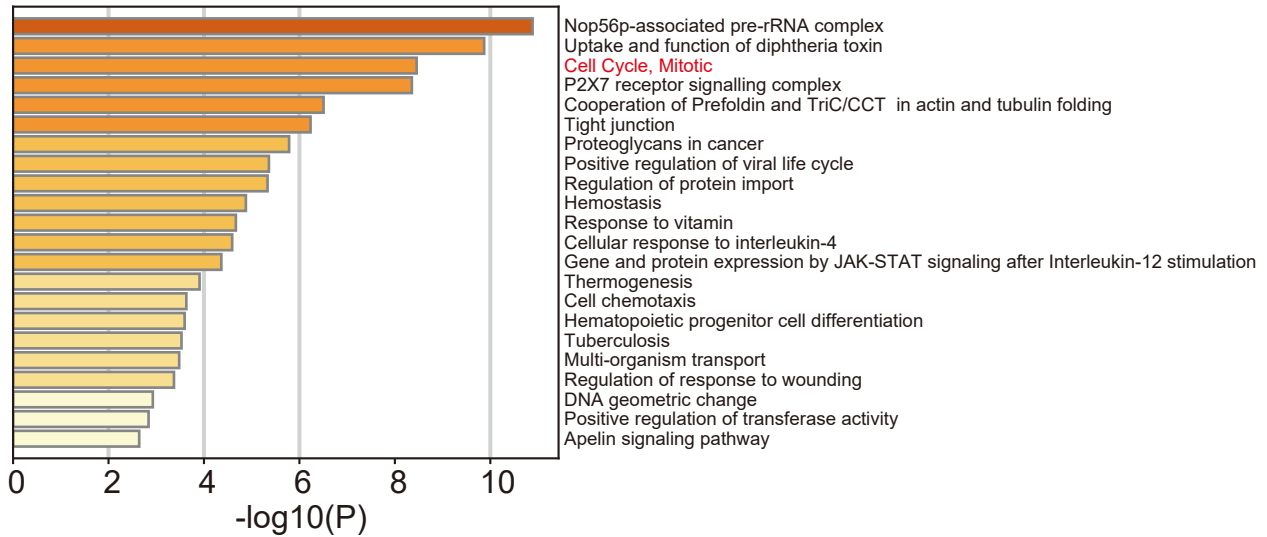

### BCL9 False gene list

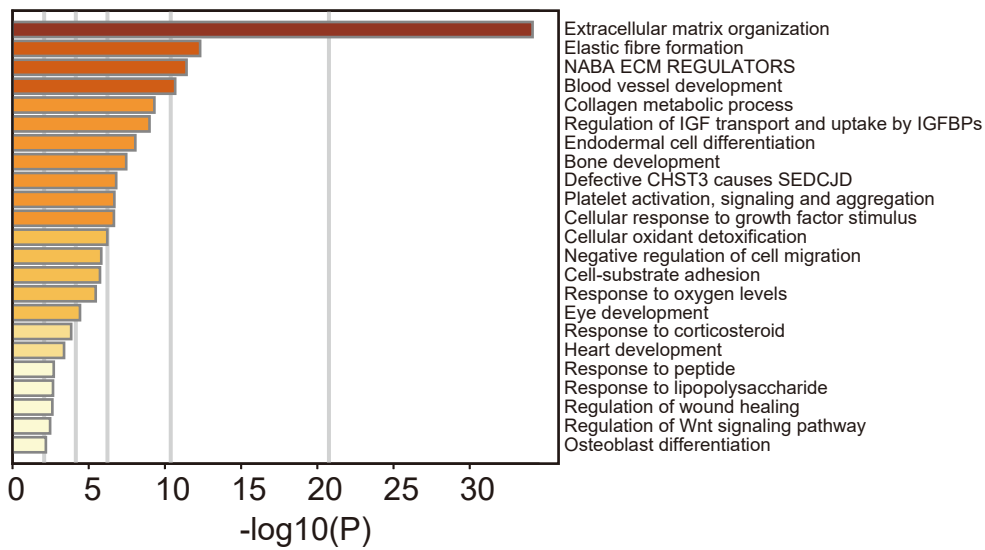

Supplement: DataSheet_1.pdf [file DataSheet_1.pdf]
